# Supplementary material
Source: publisher figshare collection journal article supplement (https://acs.figshare.com/ndownloader/files/13005524)
Supplement: Supplementary file 1 [file 13005524]

## **Supporting Information**

### **Probing the Strongest Aromatic Cyclopentadiene Ring by Hyperconjugation**

Qiong Xie, Tingting Sun, and Jun Zhu\*

State Key Laboratory of Physical Chemistry of Solid Surfaces and Collaborative Innovation Center of Chemistry for Energy Materials (iChEM), Fujian Provincial Key Laboratory of Theoretical and Computational Chemistry and Department of Chemistry, College of Chemistry and Chemical Engineering, Xiamen University, Xiamen 361005, China.



**Table S1.** The EDA results for electropositive substituted cyclopentadienes at the TPSS-D3/TZ2P level. Energies are given in kcal mol<sup>-1</sup>.

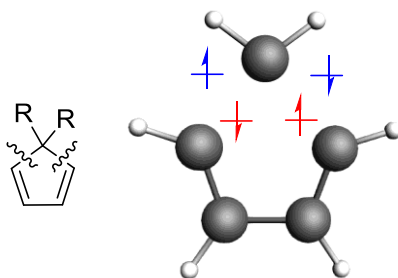

|                            | <b>1</b>        | <b>3</b>        | <b>4</b>        | <b>5</b>       |
|----------------------------|-----------------|-----------------|-----------------|----------------|
| Symmetry                   | C <sub>2v</sub> | C <sub>2v</sub> | C <sub>2v</sub> | C <sub>2</sub> |
| $\Delta E_{\text{int}}$    | -293.0          | -285.7          | -288.0          | -269.6         |
| $\Delta E_{\sigma}$        | -236.5          | -286.8          | -316.7          | -523.4         |
| $\Delta E_{\pi}$           | -189.9          | -207.2          | -218.2          | -274.8         |
| $\Delta E_{\text{meta}}$   | 5.6             | 4.7             | 2.0             | 11.6           |
| $\Delta E_{\text{orb}}$    | <b>-420.8</b>   | <b>-489.2</b>   | <b>-532.9</b>   | <b>-786.6</b>  |
| $\Delta E_{\text{Pauli}}$  | 395.4           | 514.7           | 542.8           | 995.0          |
| $\Delta E_{\text{elstat}}$ | -266.3          | -308.0          | -293.5          | -466.4         |
| $\Delta E_{\text{disp}}$   | -1.2            | -3.1            | -4.5            | -11.6          |

**Table S2.** The EDA results for the complexes **5** to **11** at the TPSS-D3/TZ2P level. Energies are given in kcal mol<sup>-1</sup>.

|                            | <b>6</b> | <b>7</b> | <b>8</b> | <b>5</b> | <b>9</b> | <b>10</b> | <b>11</b> |
|----------------------------|----------|----------|----------|----------|----------|-----------|-----------|
| $\Delta E_{\text{int}}$    | -268.5   | -268.7   | -269.0   | -269.6   | -273.1   | -272.7    | -275.6    |
| $\Delta E_{\pi}$           | -513.6   | -519.7   | -519.0   | -523.4   | -801.7   | -520.1    | -814.6    |
| $\Delta E_{\sigma}$        | -264.2   | -268.9   | -271.0   | -274.8   | /        | -278.4    | /         |
| $\Delta E_{\text{meta}}$   | 11.2     | 11.2     | 11.3     | 11.6     | 11.7     | 11.8      | 11.6      |
| $\Delta E_{\text{orb}}$    | -766.5   | -777.4   | -778.7   | -786.6   | -790.1   | -786.6    | -803.0    |
| $\Delta E_{\text{Pauli}}$  | 967.6    | 983.4    | 982.1    | 995.0    | 994.0    | 988.4     | 1014.0    |
| $\Delta E_{\text{elstat}}$ | -458.4   | -463.0   | -461.2   | -466.4   | -465.5   | -463.1    | -475.1    |
| $\Delta E_{\text{disp}}$   | -11.2    | -11.7    | -11.2    | -11.6    | -11.5    | -11.4     | -11.5     |

In EDA, bond formation between the interacting fragments can be divided into four terms: electrostatic interactions ( $\Delta E_{\text{elstat}}$ ), Pauli repulsive orbital interactions ( $\Delta E_{\text{Pauli}}$ ), and attractive orbital interactions ( $\Delta E_{\text{orb}}$ ), and dispersion interactions ( $\Delta E_{\text{disp}}$ ), the total bonding energy can be described in this equation [Eq. (1)], in which the  $\Delta E_{\text{elstat}}$  and  $\Delta E_{\text{Pauli}}$  can be combined into a steric interaction term,  $\Delta E_{\text{steric}} = \Delta E_{\text{Pauli}} + \Delta E_{\text{elstat}}$ . The term  $\Delta E_{\text{elstat}}$  corresponds to quasi-classical electrostatic attraction, which is calculated with the frozen geometry of the entire molecule, are superimposed without electronic relaxation. The Pauli repulsion  $\Delta E_{\text{Pauli}}$  refers to the product wave function becomes antisymmetrized and renormalized. The stabilizing orbital interaction  $\Delta E_{\text{orb}}$  represents the molecular orbitals relax to their final form. The orbital interaction energy can be further divided into contributions of orbitals having different symmetry ( $\Delta E_{\text{orb}} = \Delta E_{\pi} + \Delta E_{\sigma}$ ). In addition, the  $\Delta E_{\text{meta}}$  refers the MetaGGA correction in the total orbital interactions. This orbital interaction  $\Delta E_{\text{orb}}$  is crucial for the present study.

$$\Delta E_{\text{int}} = \Delta E_{\text{elstat}} + \Delta E_{\text{Pauli}} + \Delta E_{\text{orb}} + \Delta E_{\text{disp}} \quad (1).$$

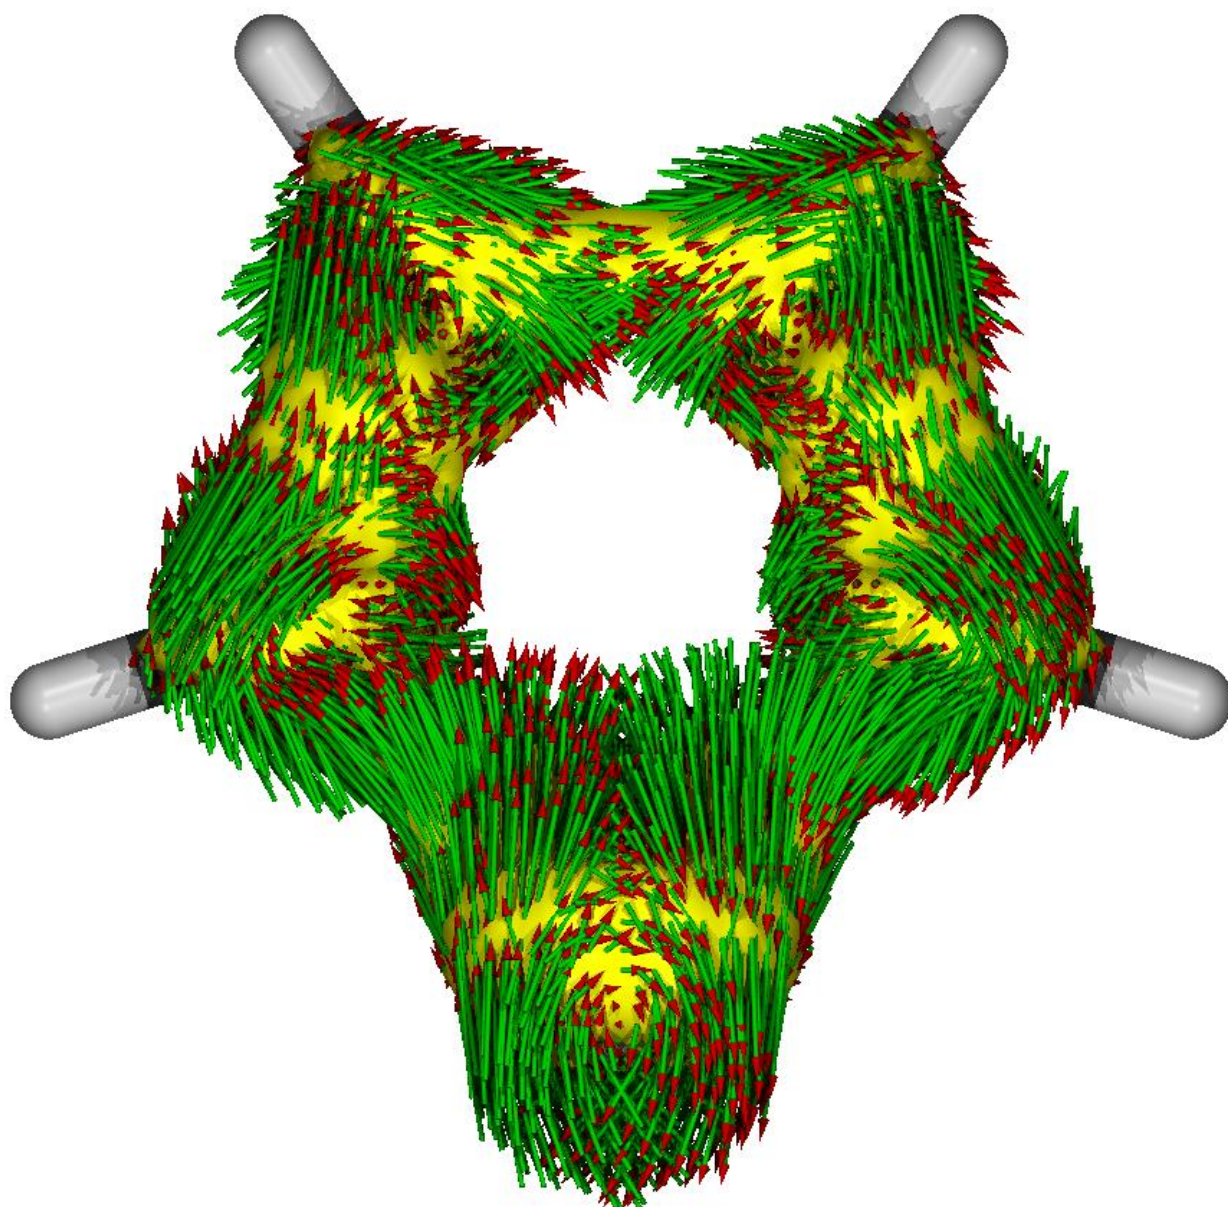

**Figure S1.** ACID isosurfaces of **1**. Current density vectors are plotted onto the ACID by the  $\pi$  contribution with an isosurface of 0.030 to indicate dia- and paratropic ring currents. The magnetic field vector is orthogonal with respect to the ring plane and points upward (clockwise currents are diatropic).

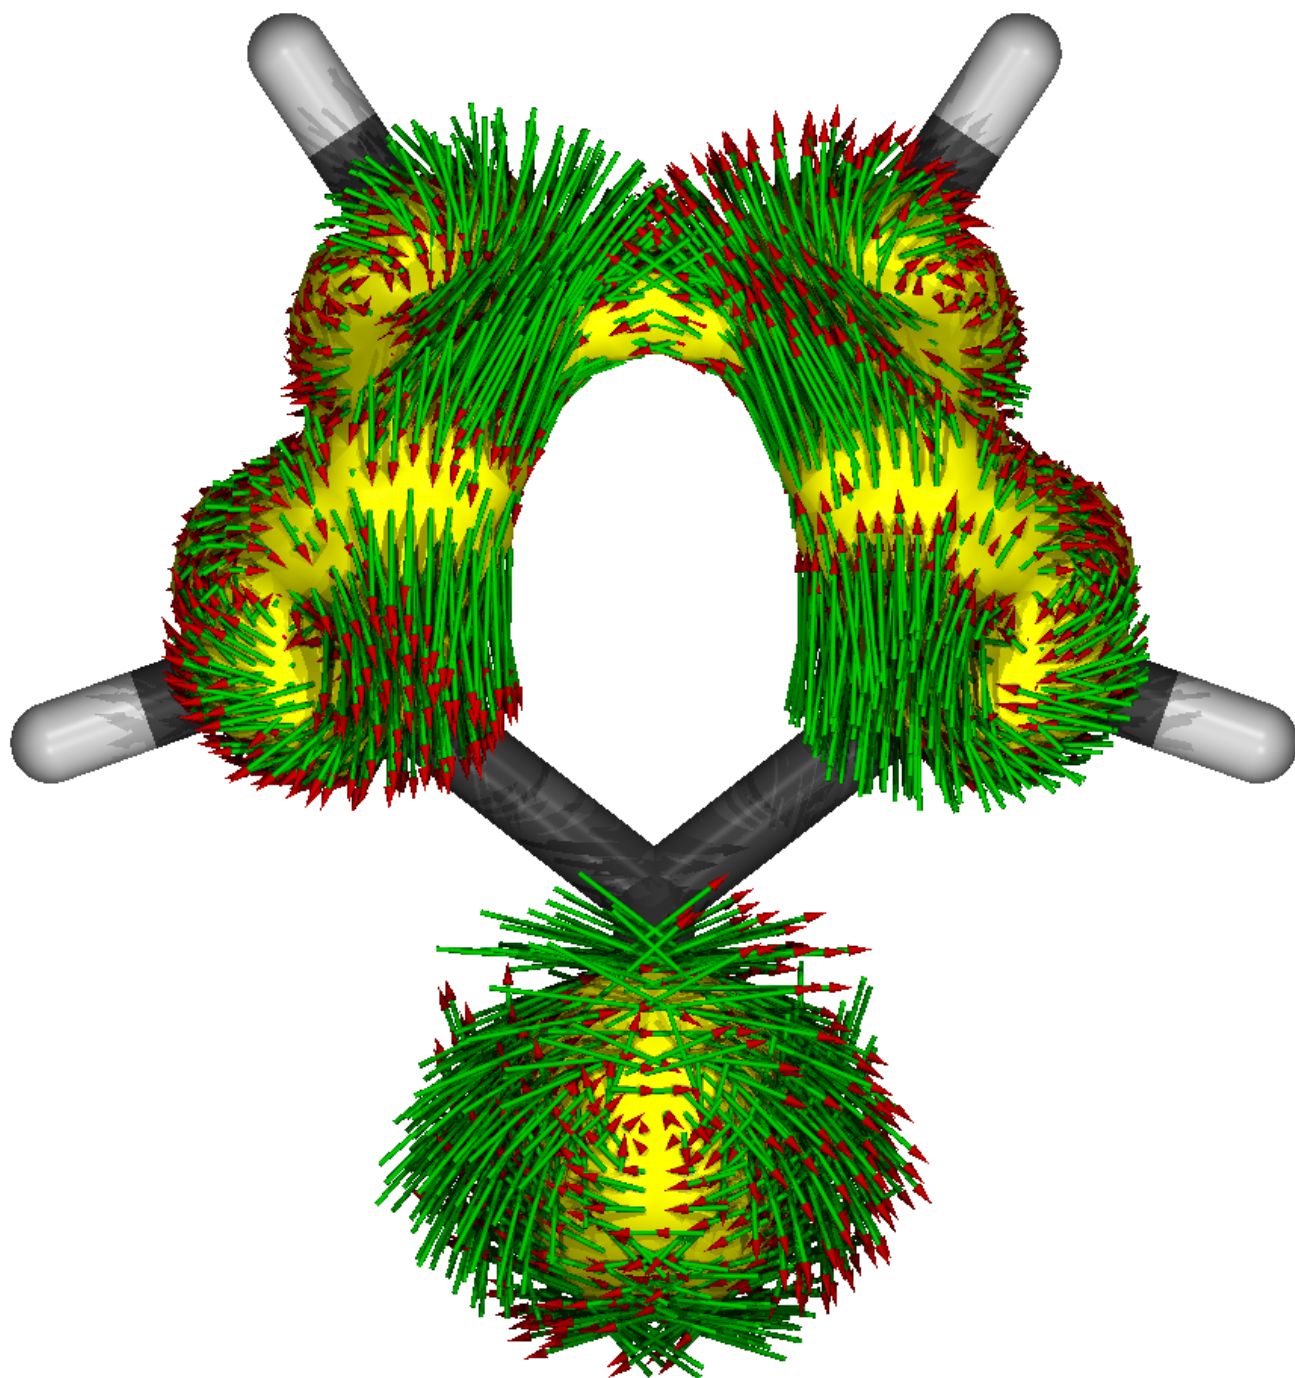

**Figure S2.** ACID isosurfaces of **2**. Current density vectors are plotted onto the ACID by the  $\pi$  contribution with an isosurface of 0.030 to indicate dia- and paratropic ring currents. The magnetic field vector is orthogonal with respect to the ring plane and points upward (clockwise currents are diatropic).



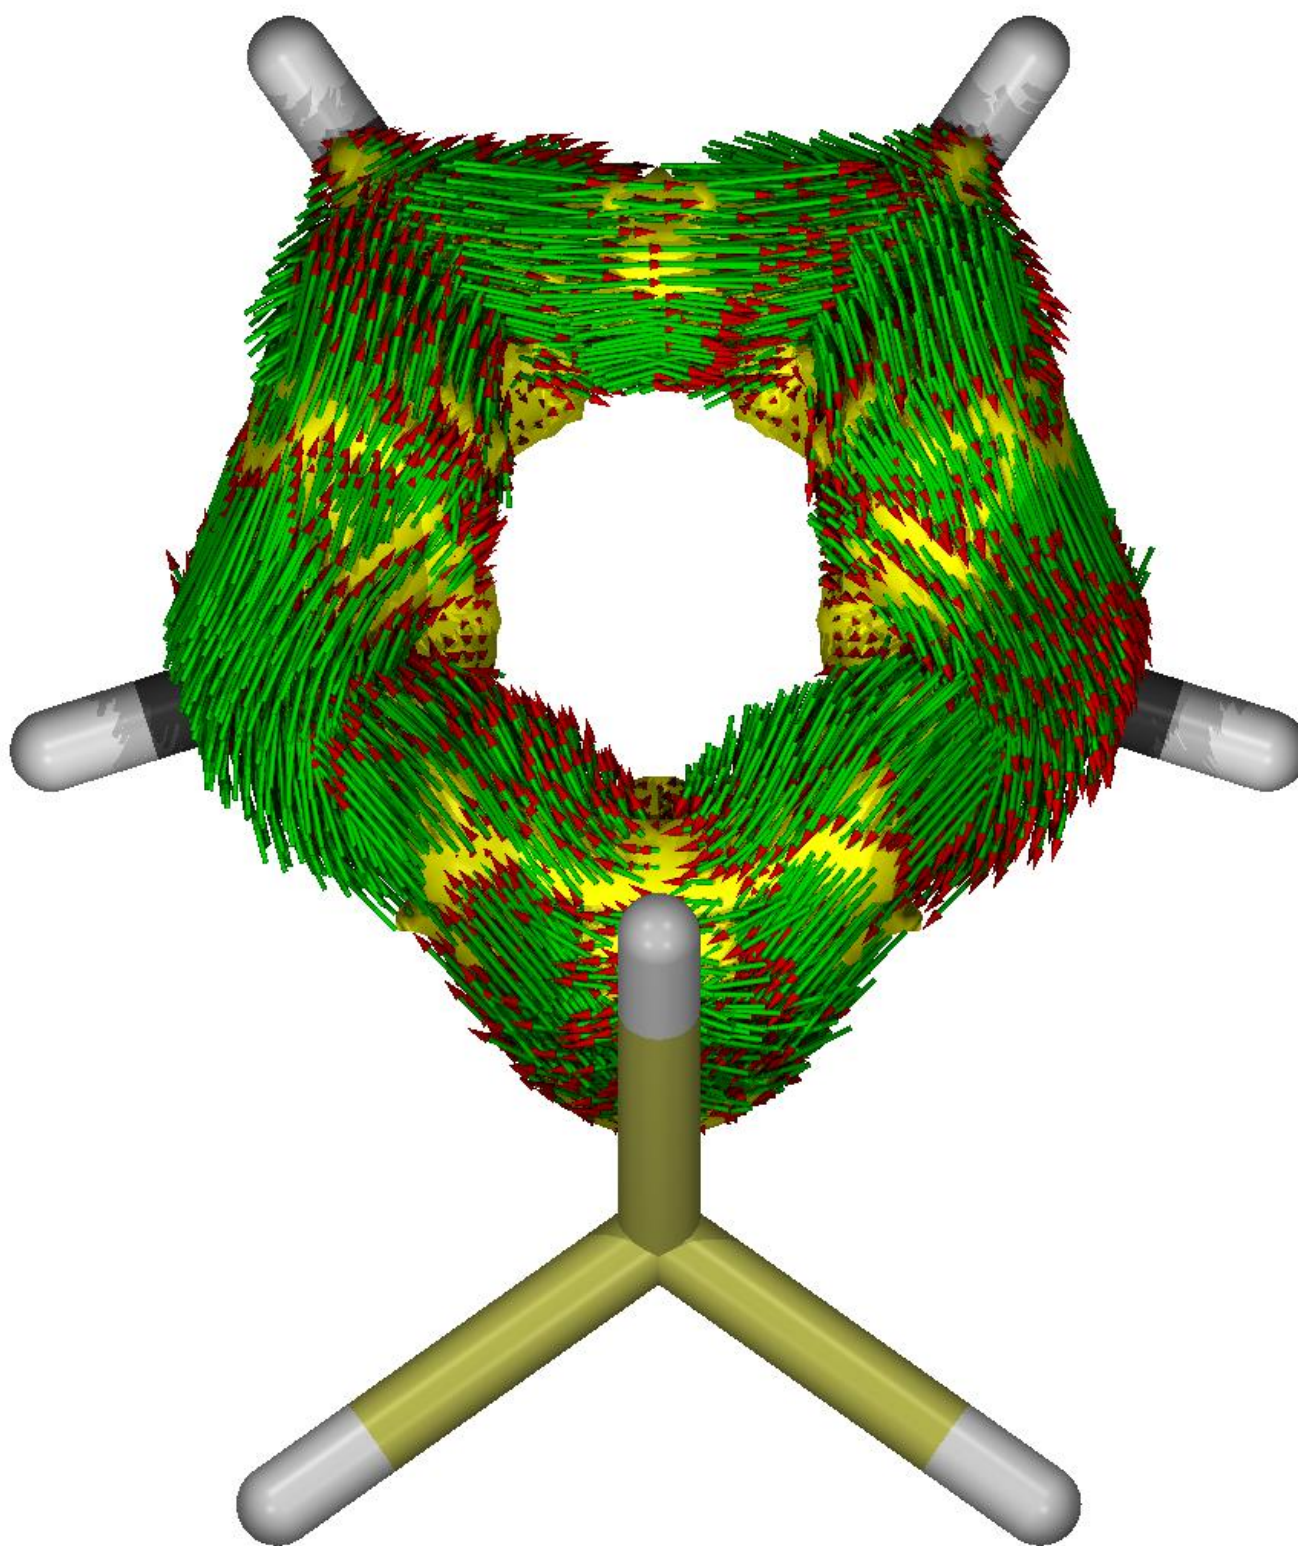

**Figure S3.** ACID isosurfaces of **3**. Current density vectors are plotted onto the ACID by the  $\pi$  contribution with an isosurface of 0.030 to indicate dia- and paratropic ring currents. The magnetic field vector is orthogonal with respect to the ring plane and points upward (clockwise currents are diatropic).

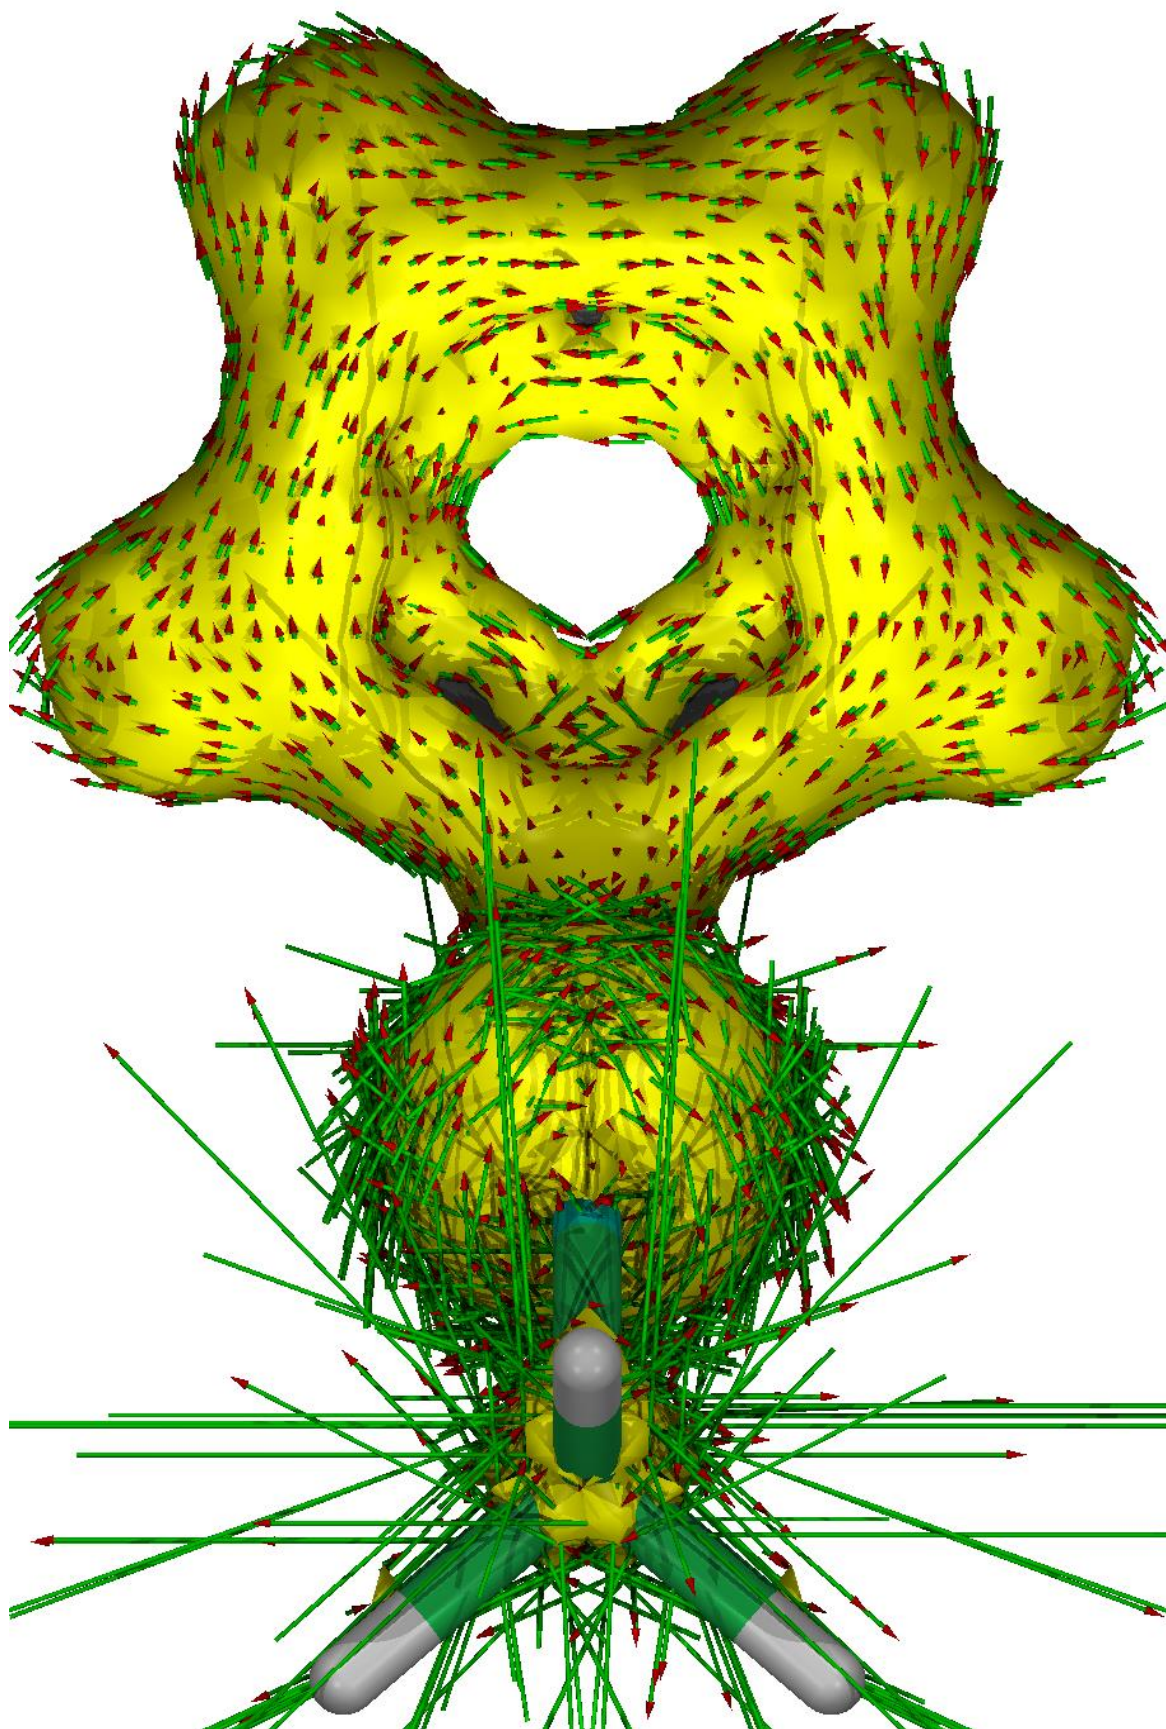

**Figure S4.** ACID isosurfaces of **4**. Current density vectors are plotted onto the ACID isosurface of 0.030 to indicate dia- and paratropic ring currents. The magnetic field vector is orthogonal with respect to the ring plane and points upward (clockwise currents are



diatropic).

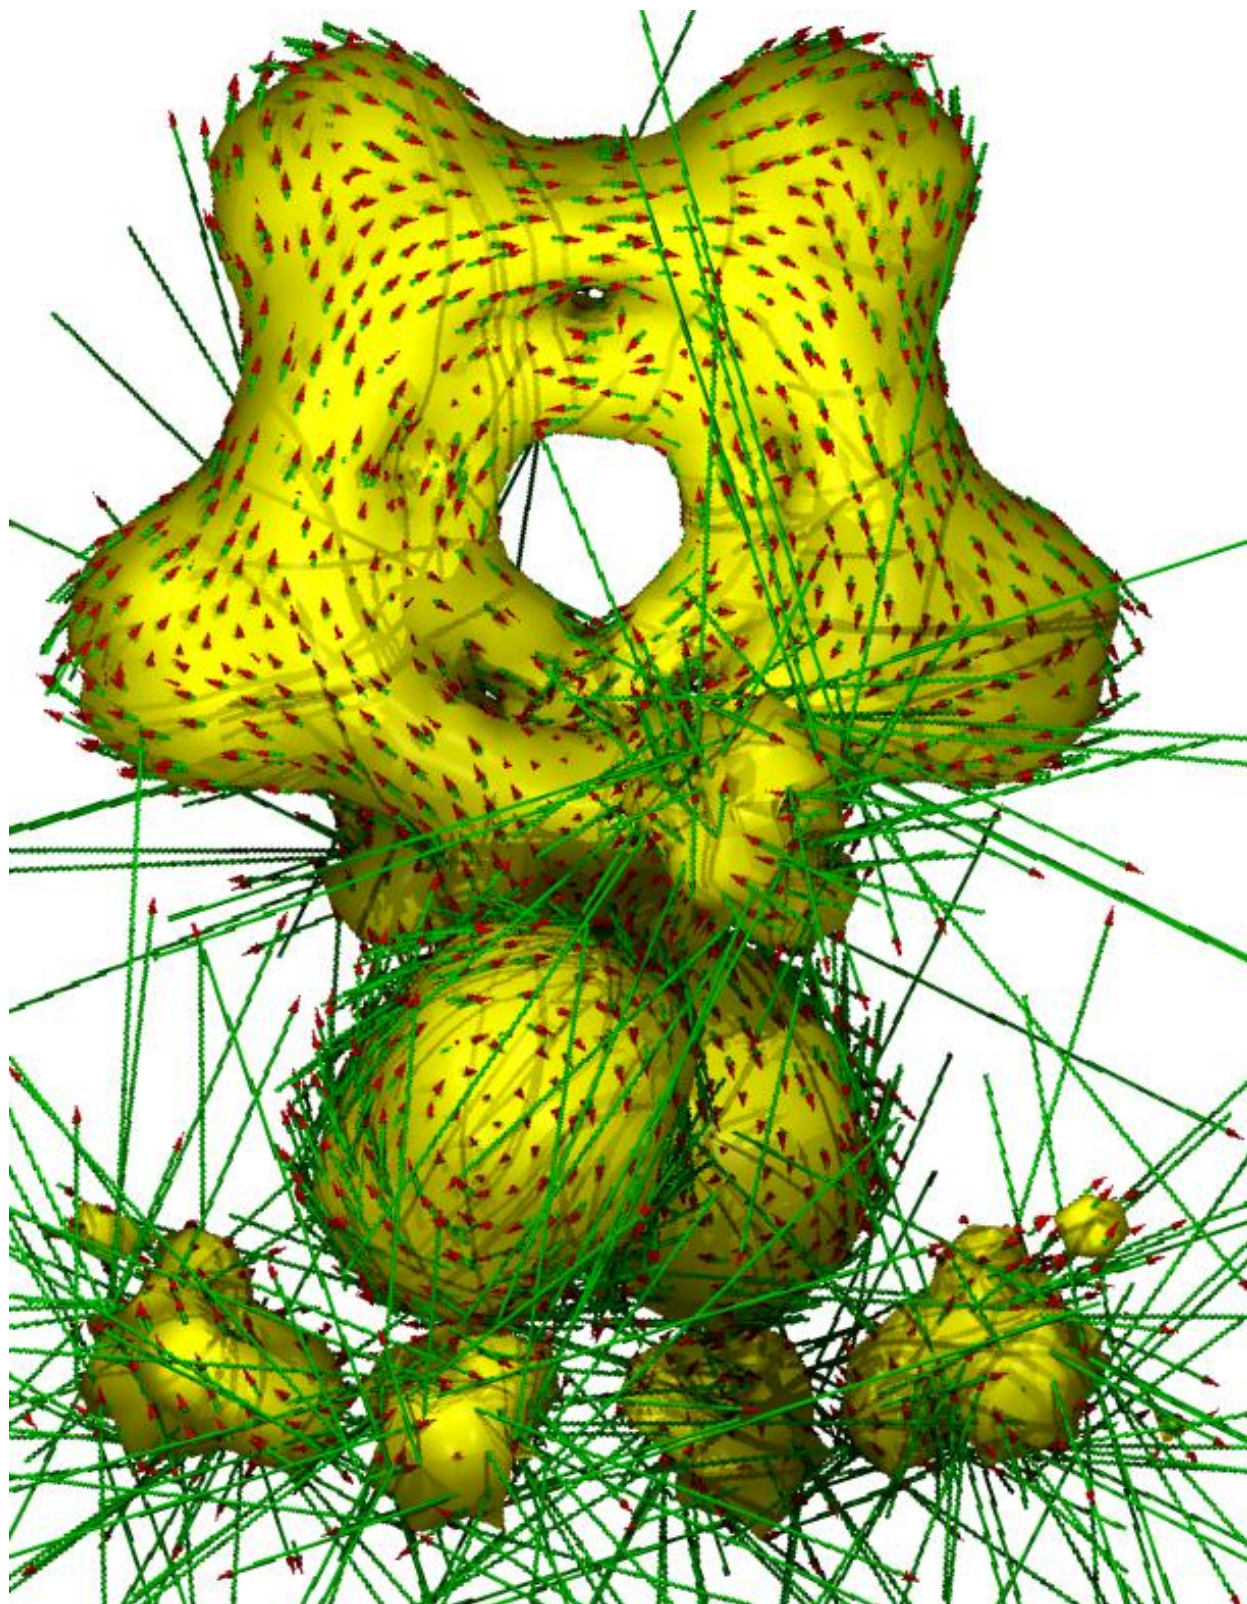

**Figure S5.** ACID isosurfaces of **5**. Current density vectors are plotted onto the ACID isosurface of 0.030 to indicate dia- and paratropic ring currents. The magnetic field vector is orthogonal with respect to the ring plane and points upward (clockwise currents are diatropic).



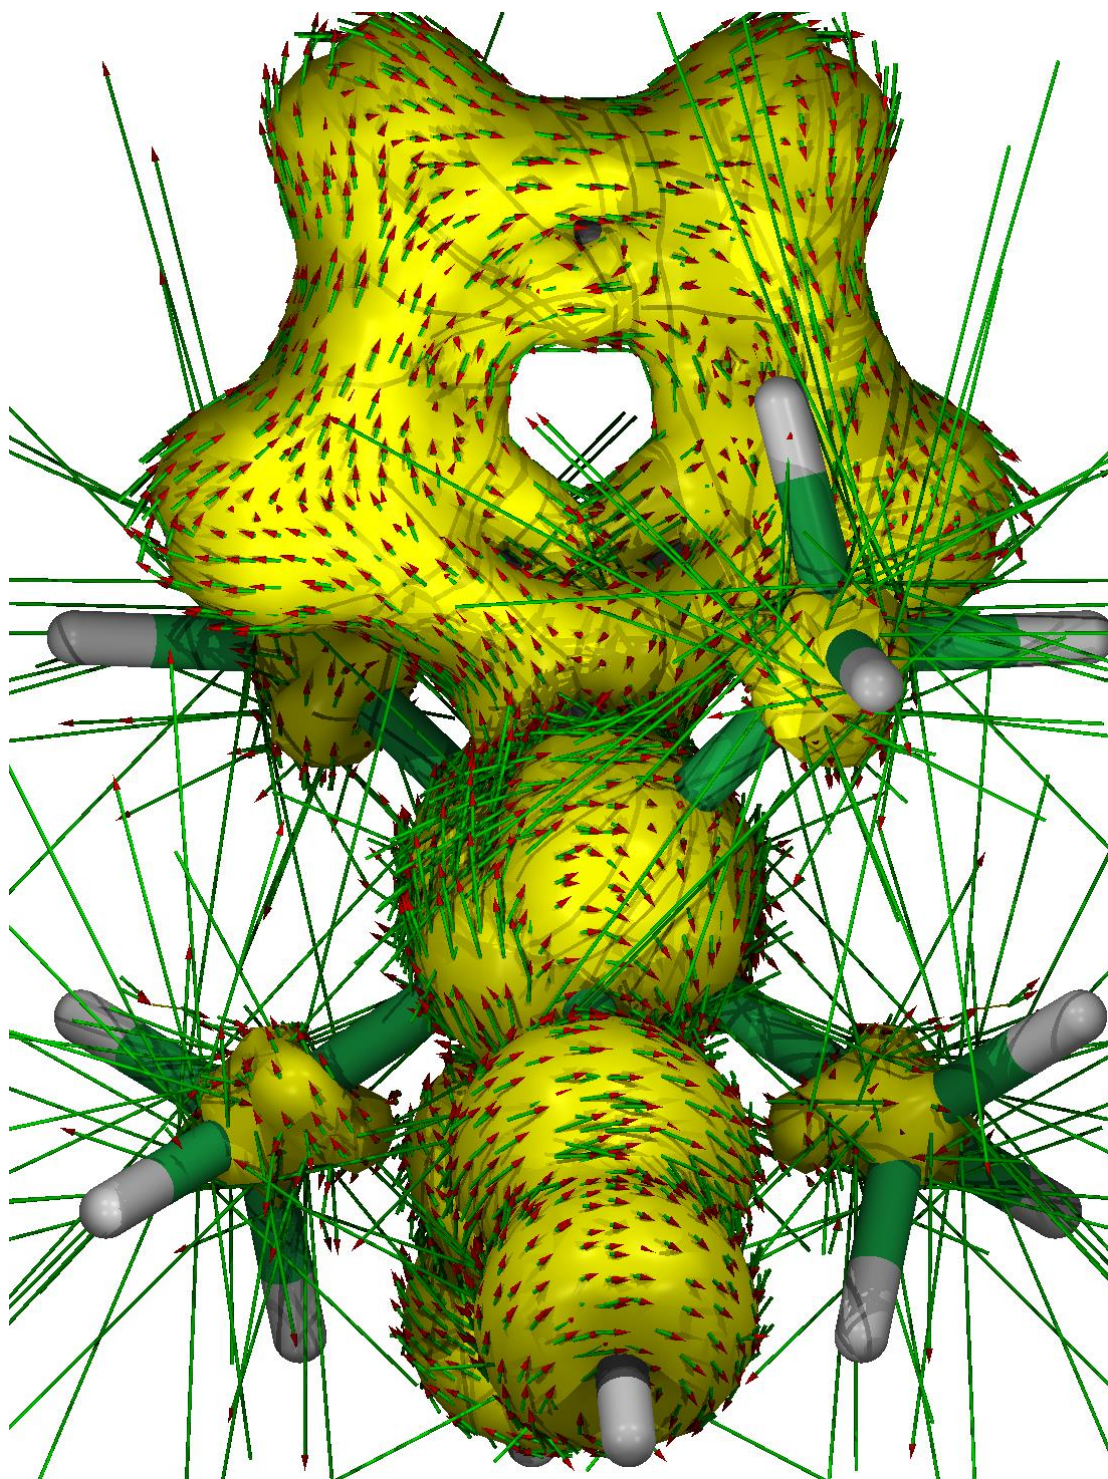

**Figure S6.** ACID isosurfaces of **6**. Current density vectors are plotted onto the ACID isosurface of 0.030 to indicate dia- and paratropic ring currents. The magnetic field vector is orthogonal with respect to the ring plane and points upward (clockwise currents are diatropic).



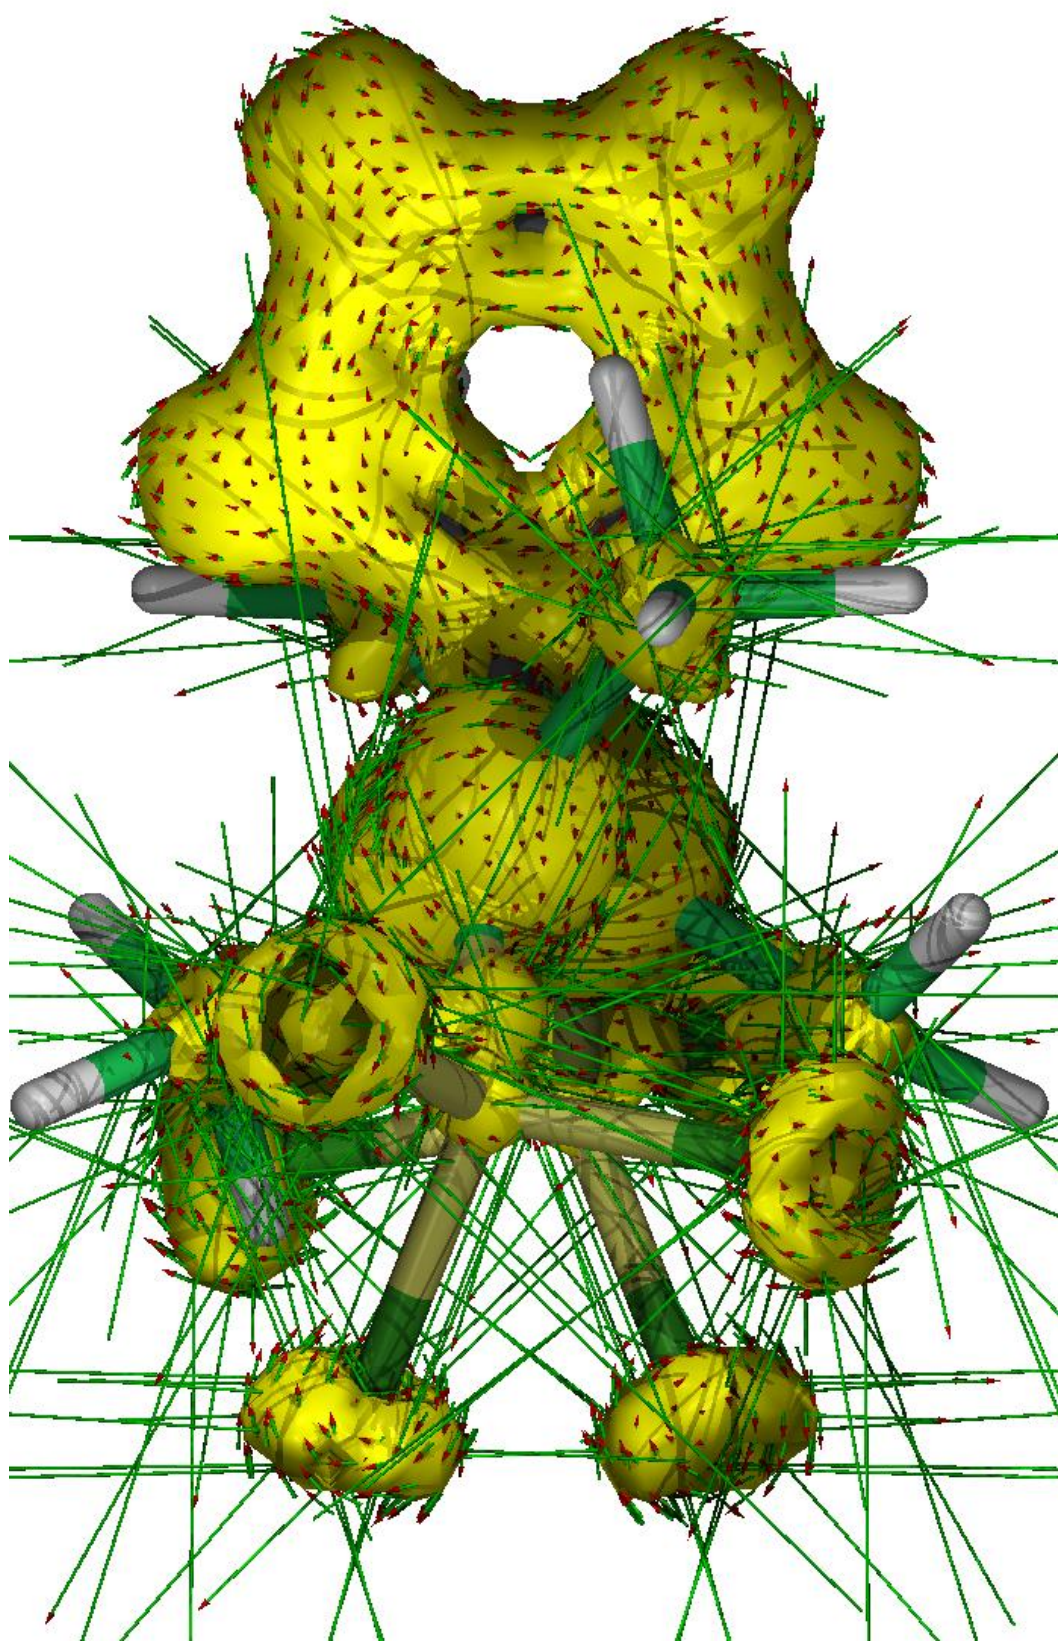

**Figure S7.** ACID isosurfaces of **7**. Current density vectors are plotted onto the ACID isosurface of 0.030 to indicate dia- and paratropic ring currents. The magnetic field vector is orthogonal with respect to the ring plane and points upward (clockwise currents are diatropic).



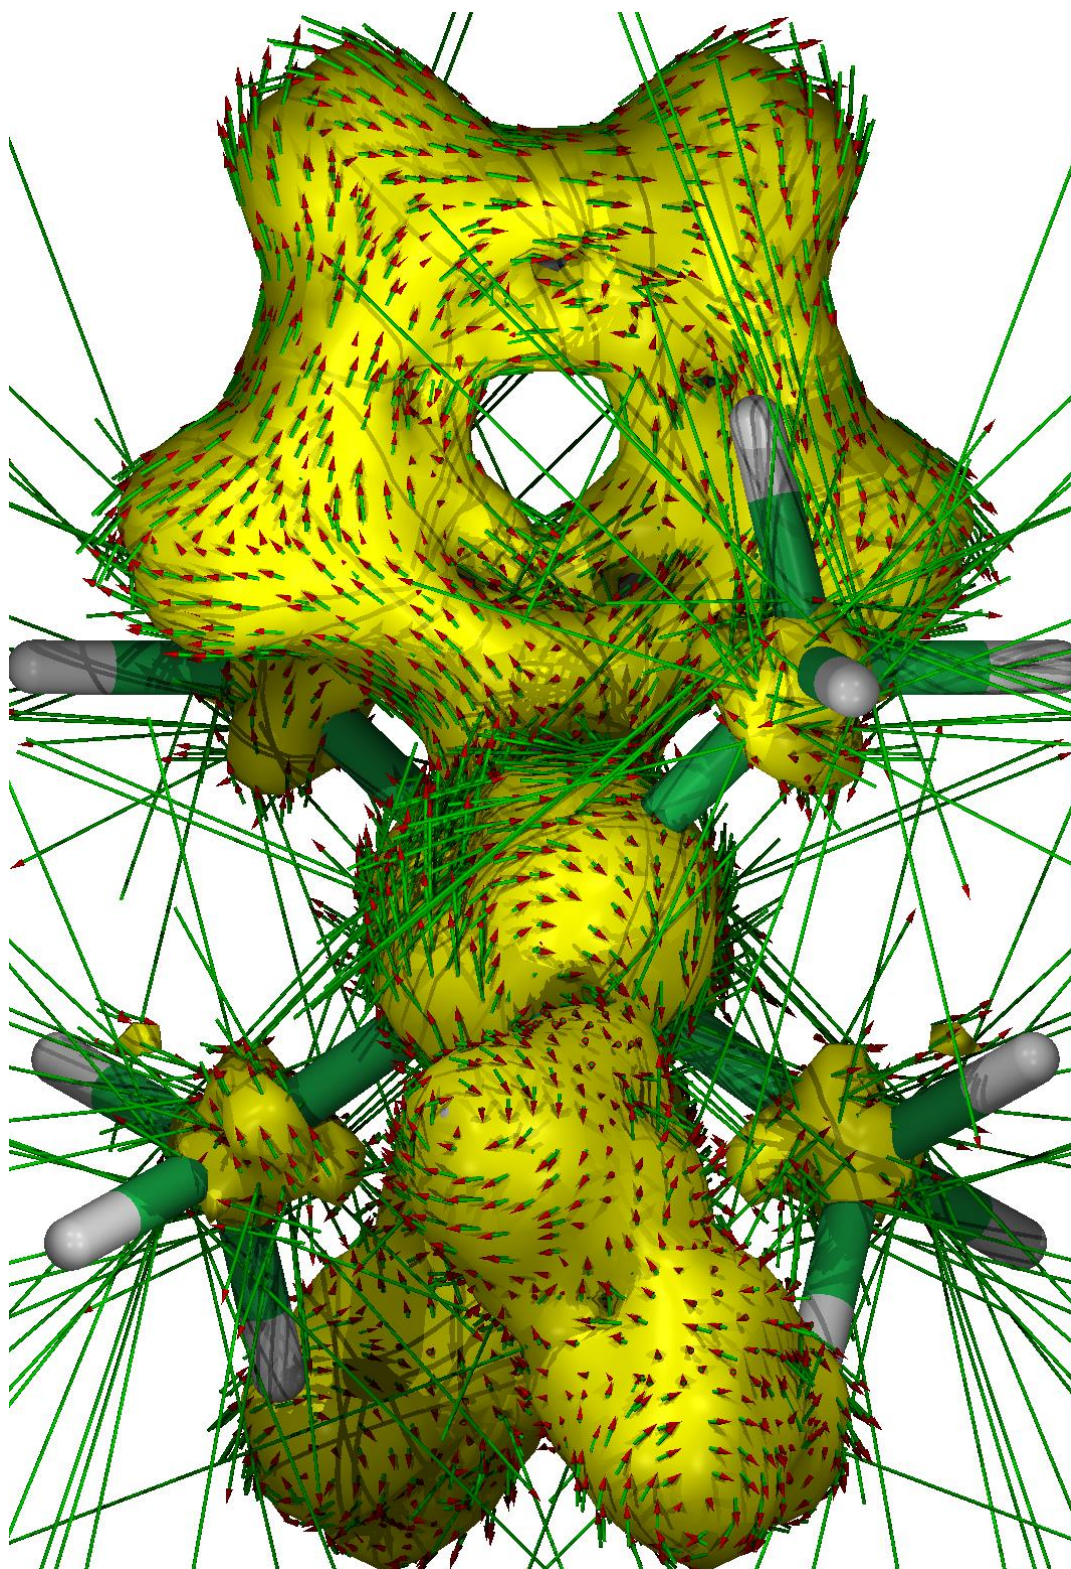

**Figure S8.** ACID isosurfaces of **8**. Current density vectors are plotted onto the ACID isosurface of 0.030 to indicate dia- and paratropic ring currents. The magnetic field vector is orthogonal with respect to the ring plane and points upward (clockwise currents are diatropic).



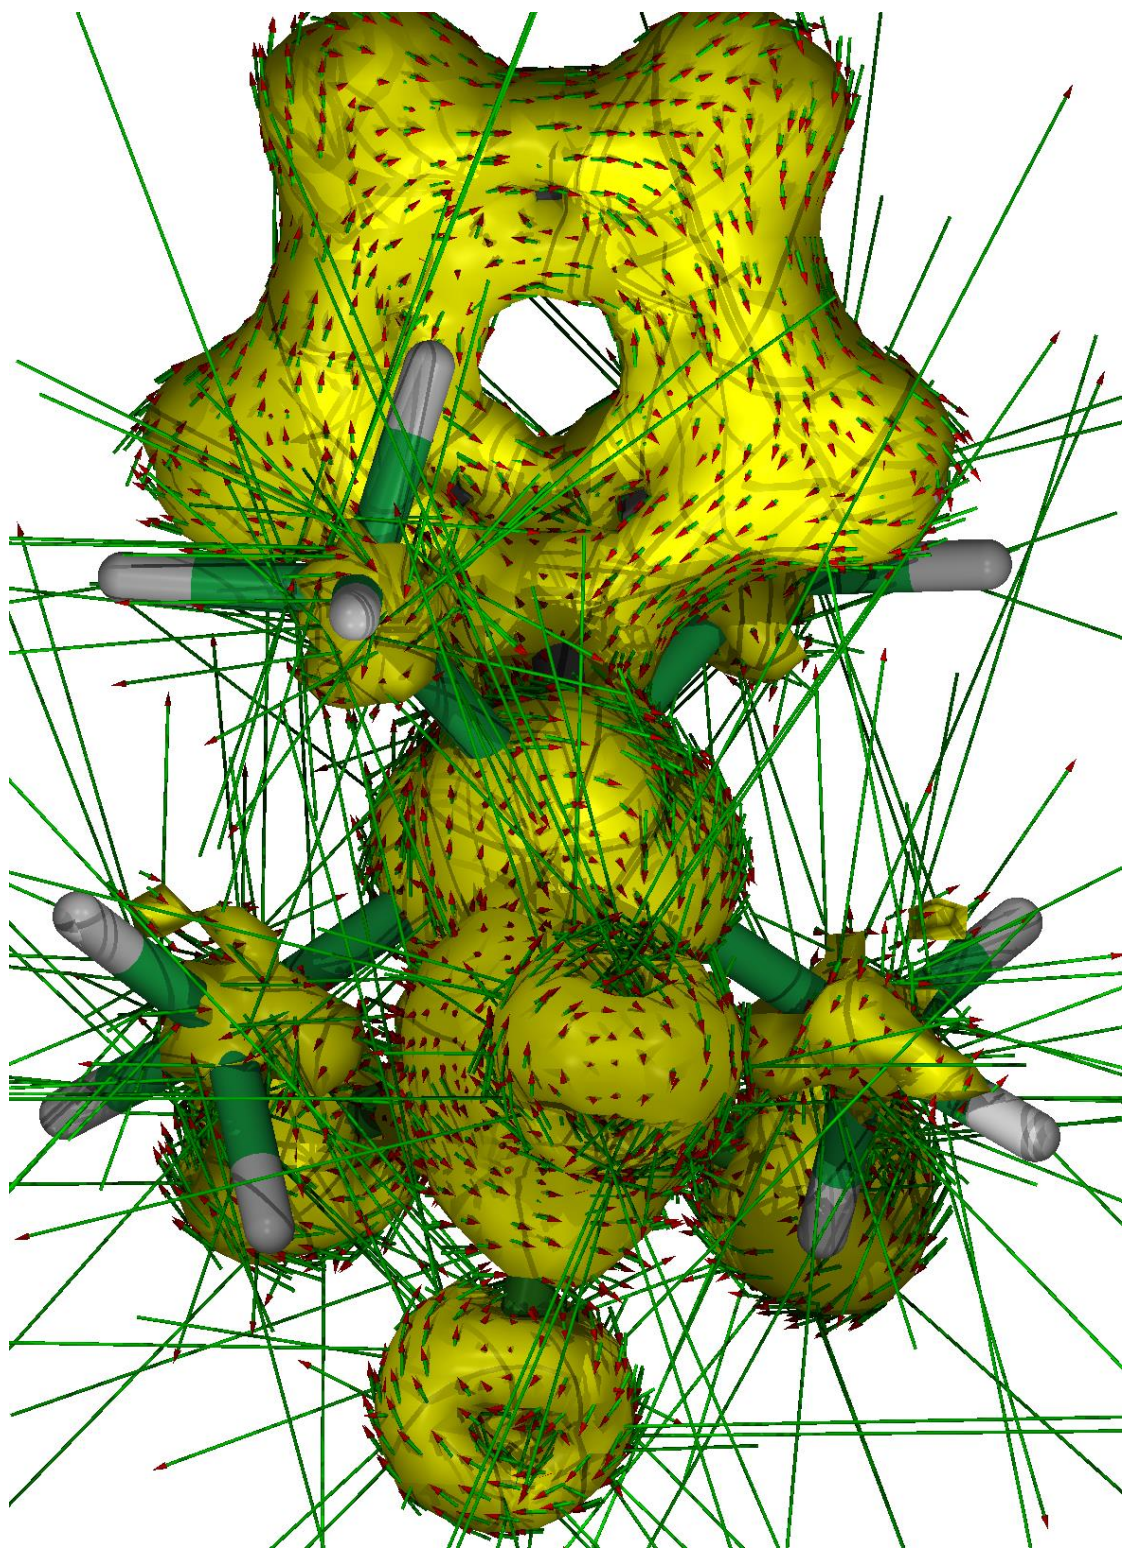

**Figure S9.** ACID isosurfaces of **9**. Current density vectors are plotted onto the ACID isosurface of 0.030 to indicate dia- and paratropic ring currents. The magnetic field vector is orthogonal with respect to the ring plane and points upward (clockwise currents are diatropic).



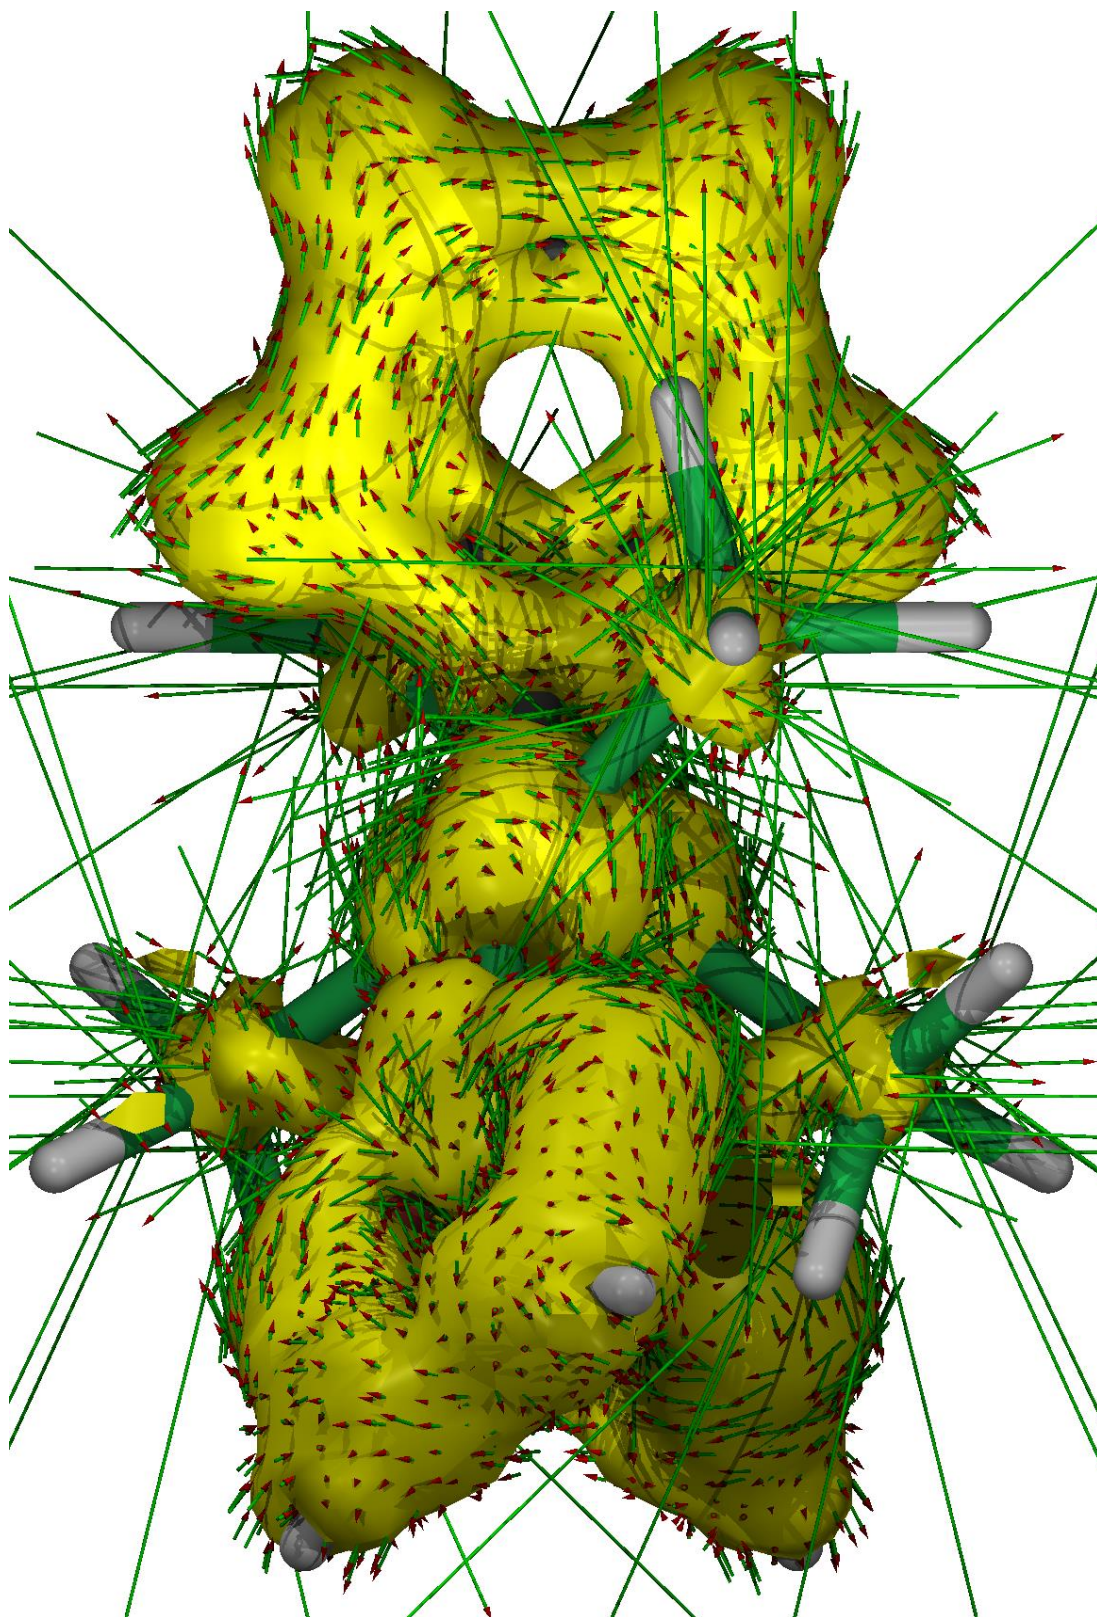

**Figure S10.** ACID isosurfaces of **10**. Current density vectors are plotted onto the ACID isosurface of 0.030 to indicate dia- and paratropic ring currents. The magnetic field vector is orthogonal with respect to the ring plane and points upward (clockwise currents are diatropic).



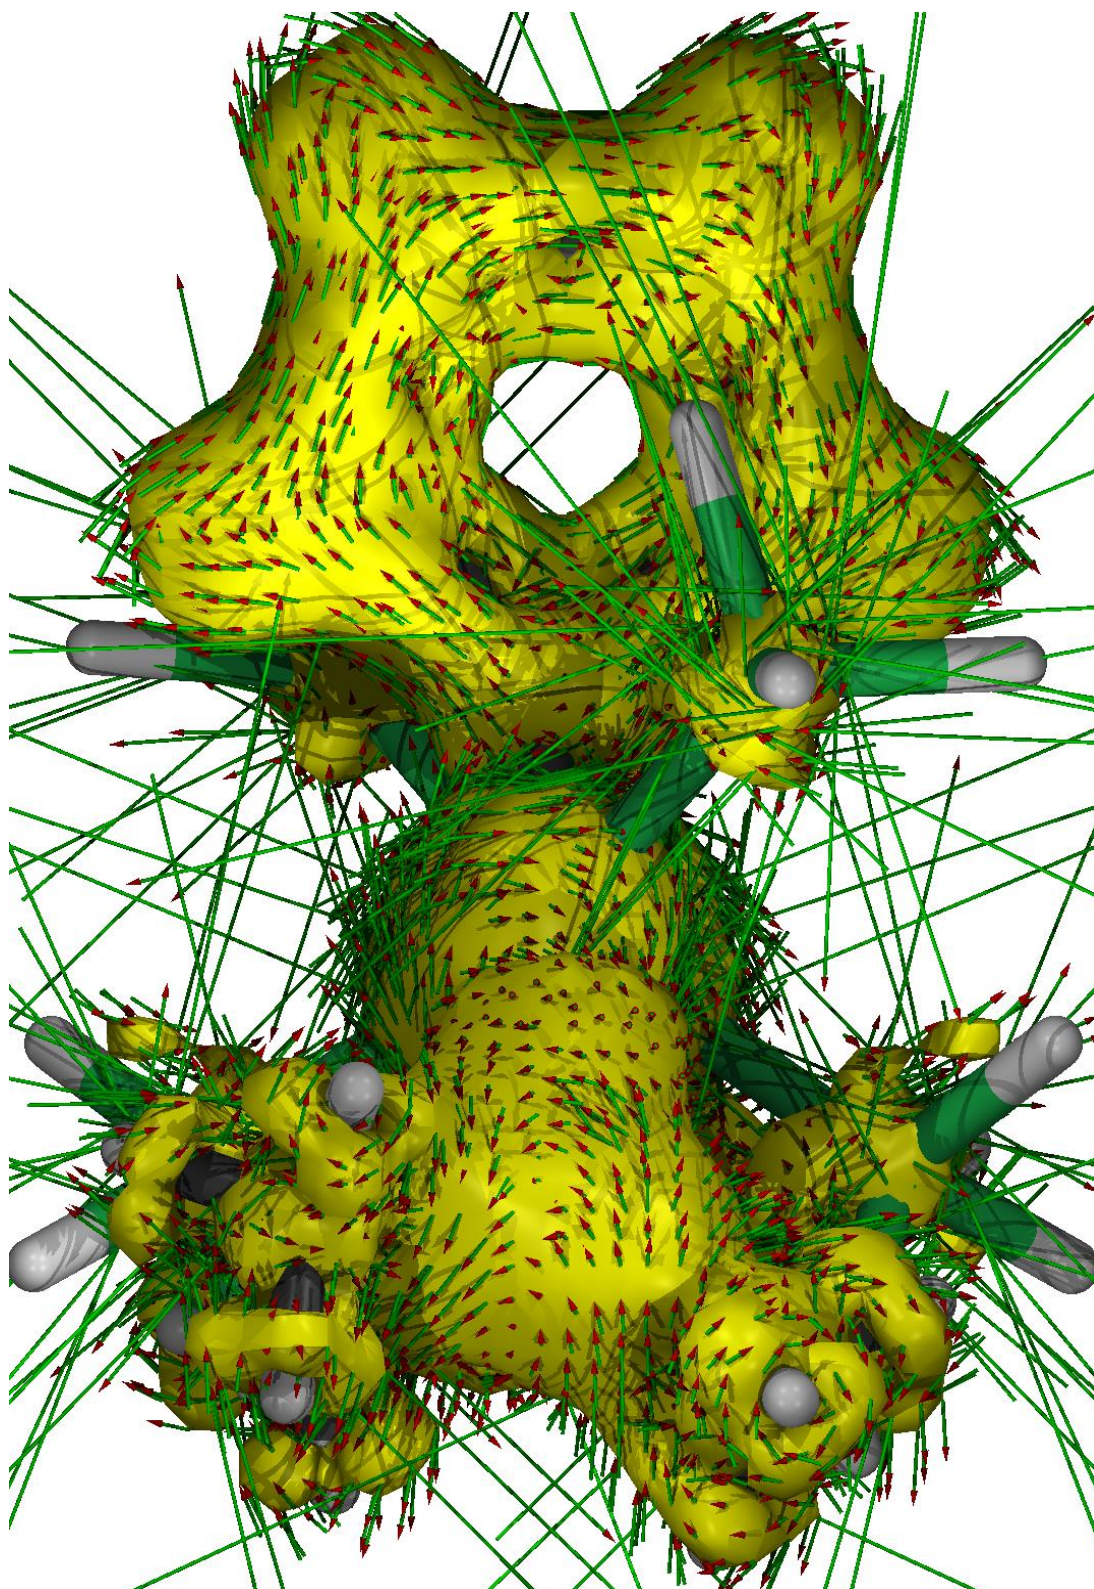

**Figure S11.** ACID isosurfaces of **11**. Current density vectors are plotted onto the ACID isosurface of 0.030 to indicate dia- and paratropic ring currents. The magnetic field vector is orthogonal with respect to the ring plane and points upward (clockwise currents are diatropic).

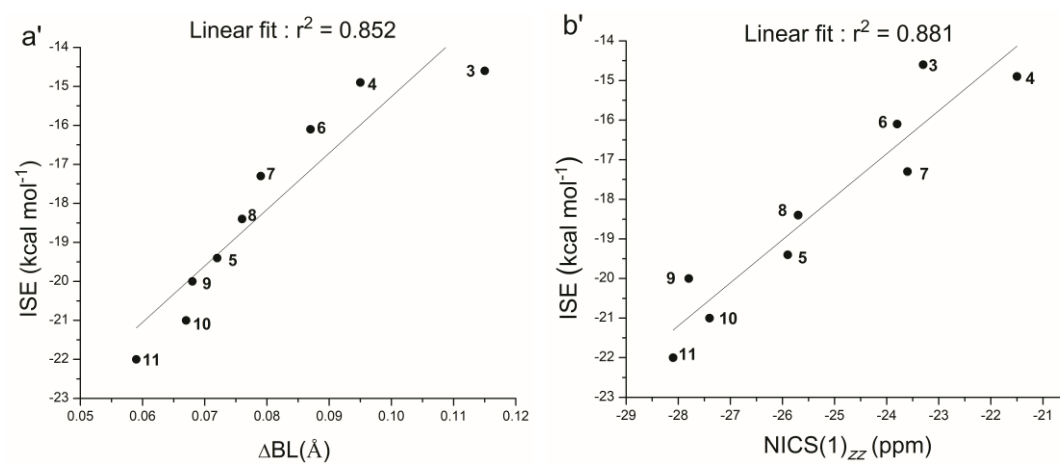

**Figure S12.** Correlation between the ISE values against  $\Delta BL$  (a') or NICS values (b') for the substituted cyclopentadienes without **1** and **2**.

$\text{PH}_3$

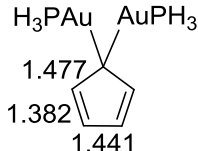

**4**

$\Delta\text{BL}$  0.095

ISE -14.9

NICS(1)<sub>zz</sub> -21.5



**11**

0.059

-22.0

-28.1

$\text{PMe}_3$



**4'**

$\Delta\text{BL}$  0.089

ISE -16.0

NICS(1)<sub>zz</sub> -22.8



**11'**

0.066

-23.1

-30.4

**Figure S13.** The C-C bond lengths (Å),  $\Delta\text{BL}$  values (Å), ISE values (kcal mol<sup>-1</sup>) and NICS values (ppm) of substituted cyclopentadienes **4**, **4'**, **11** and **11'**.

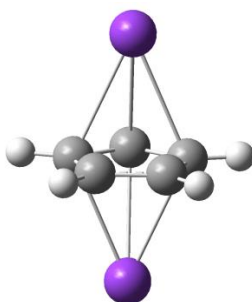

**Figure S14.** Optimizing the geometry of complex **12** (potassium substituted cyclopentadiene) leads to a  $\eta^5$  copper complex (Similar Cp complexes have been previously reported). So in our paper, we didn't consider the other main group metal like potassium.
